# Supplementary material for: Microsatellite instability is a biomarker for immune checkpoint inhibitors in endometrial cancer
Source: PubMed Central journal article supplement (PMC5814165; doi:10.18632/oncotarget.23790), 2017-12-31
Supplement: oncotarget-09-5652-s001.pdf [file oncotarget-09-5652-s001.pdf]

# Microsatellite instability is a biomarker for immune checkpoint inhibitors in endometrial cancer

## SUPPLEMENTARY MATERIALS

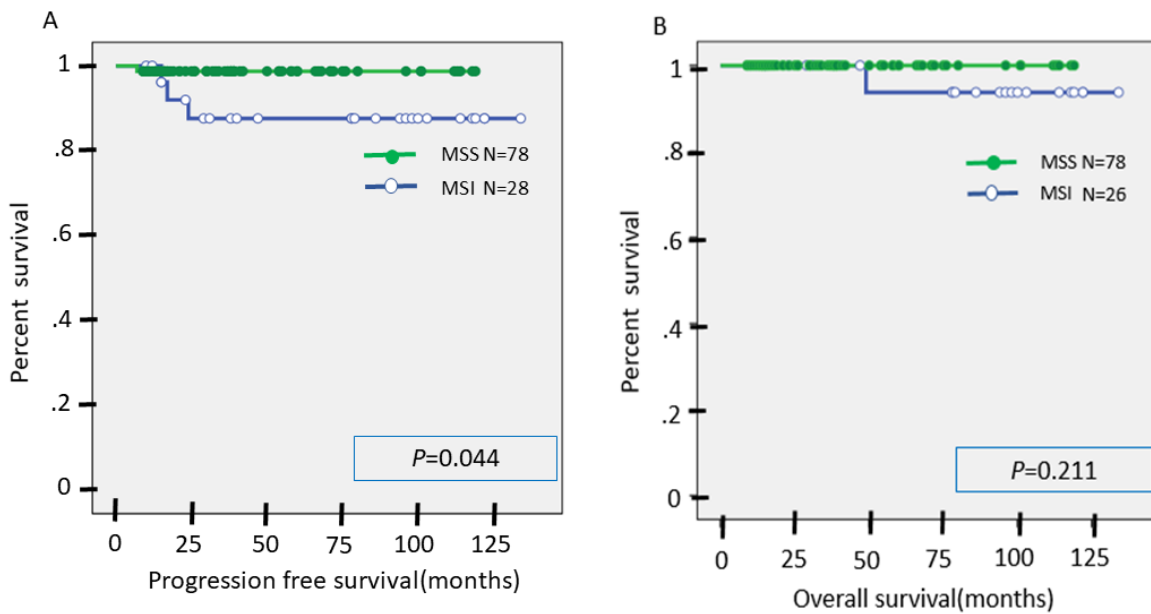

Supplementary Figure 1: A, B Kaplan-Meier analysis of progression-free (A) and overall (B) survival between the MSI group and MSS group in stage I/II cases.

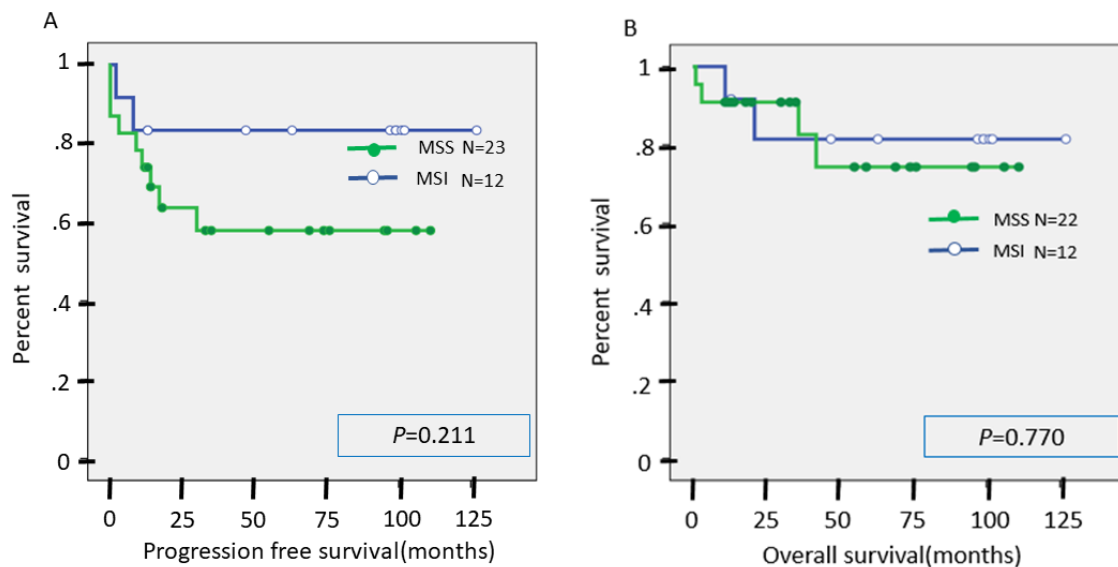

Supplementary Figure 2: A, B Kaplan-Meier analysis of progression-free (A) and overall (B) survival between the MSI group and MSS group in stage III/IV cases.
